# Supplementary material for: A strategy for the diversity-oriented synthesis of macrocyclic scaffolds using multidimensional coupling
Source: Springer Nature journal article supplement (doi:10.1038/nchem.1729), 2013-08-23
Supplement: 41557_2013_BFnchem1729_MOESM5_ESM.mol [file 41557_2013_BFnchem1729_MOESM5_ESM.mol]

  ChemDraw07311304372D

 46 46  0  0  0  0  0  0  0  0999 V2000
    0.7206    1.1886    0.0000 O   0  0  0  0  0  0  0  0  0  0  0  0
    1.4375    1.6025    0.0000 C   0  0  0  0  0  0  0  0  0  0  0  0
    2.1519    1.1900    0.0000 C   0  0  0  0  0  0  0  0  0  0  0  0
    2.8663    1.6025    0.0000 N   0  0  0  0  0  0  0  0  0  0  0  0
    3.5807    1.1900    0.0000 C   0  0  0  0  0  0  0  0  0  0  0  0
    2.8663    2.4274    0.0000 C   0  0  0  0  0  0  0  0  0  0  0  0
    3.5807    2.8399    0.0000 C   0  0  0  0  0  0  0  0  0  0  0  0
    4.2935    3.2509    0.0000 C   0  0  0  0  0  0  0  0  0  0  0  0
    3.5807    0.3651    0.0000 C   0  0  0  0  0  0  0  0  0  0  0  0
    4.2951    1.6025    0.0000 O   0  0  0  0  0  0  0  0  0  0  0  0
    1.4375    2.4274    0.0000 O   0  0  0  0  0  0  0  0  0  0  0  0
    2.8638   -0.0488    0.0000 C   0  0  0  0  0  0  0  0  0  0  0  0
    2.8638   -0.8765    0.0000 C   0  0  0  0  0  0  0  0  0  0  0  0
    3.5807   -1.2904    0.0000 C   0  0  0  0  0  0  0  0  0  0  0  0
    4.2976   -0.8765    0.0000 C   0  0  0  0  0  0  0  0  0  0  0  0
    4.2976   -0.0488    0.0000 C   0  0  0  0  0  0  0  0  0  0  0  0
    5.0120   -1.2890    0.0000 N   0  0  0  0  0  0  0  0  0  0  0  0
    0.0037    1.6025    0.0000 C   0  0  0  0  0  0  0  0  0  0  0  0
   -0.7131    1.1886    0.0000 C   0  0  0  0  0  0  0  0  0  0  0  0
   -1.4300    1.6025    0.0000 C   0  0  0  0  0  0  0  0  0  0  0  0
   -2.1469    1.1886    0.0000 C   0  0  0  0  0  0  0  0  0  0  0  0
   -2.1469    0.3608    0.0000 C   0  0  0  0  0  0  0  0  0  0  0  0
   -2.8638   -0.8808    0.0000 C   0  0  0  0  0  0  0  0  0  0  0  0
   -3.5807   -1.2947    0.0000 C   0  0  0  0  0  0  0  0  0  0  0  0
   -3.5807   -2.1225    0.0000 C   0  0  0  0  0  0  0  0  0  0  0  0
   -5.0120   -2.1239    0.0000 F   0  0  0  0  0  0  0  0  0  0  0  0
   -3.8850   -3.2509    0.0000 F   0  0  0  0  0  0  0  0  0  0  0  0
   -3.1682   -2.8370    0.0000 F   0  0  0  0  0  0  0  0  0  0  0  0
   -2.7557   -2.1225    0.0000 F   0  0  0  0  0  0  0  0  0  0  0  0
   -3.9932   -0.5803    0.0000 F   0  0  0  0  0  0  0  0  0  0  0  0
   -4.4057   -1.2947    0.0000 F   0  0  0  0  0  0  0  0  0  0  0  0
   -2.4513   -1.5953    0.0000 F   0  0  0  0  0  0  0  0  0  0  0  0
   -2.0388   -0.8808    0.0000 F   0  0  0  0  0  0  0  0  0  0  0  0
   -3.6888   -0.0531    0.0000 F   0  0  0  0  0  0  0  0  0  0  0  0
   -1.7344   -0.3536    0.0000 F   0  0  0  0  0  0  0  0  0  0  0  0
   -1.3219    0.3608    0.0000 F   0  0  0  0  0  0  0  0  0  0  0  0
   -2.5594    1.9031    0.0000 F   0  0  0  0  0  0  0  0  0  0  0  0
   -2.9719    1.1886    0.0000 F   0  0  0  0  0  0  0  0  0  0  0  0
   -1.0175    2.3170    0.0000 F   0  0  0  0  0  0  0  0  0  0  0  0
   -1.8425    2.3170    0.0000 F   0  0  0  0  0  0  0  0  0  0  0  0
   -4.2975   -2.5364    0.0000 C   0  0  0  0  0  0  0  0  0  0  0  0
   -4.7100   -3.2509    0.0000 F   0  0  0  0  0  0  0  0  0  0  0  0
   -2.8638   -0.0531    0.0000 C   0  0  0  0  0  0  0  0  0  0  0  0
   -3.2763    0.6614    0.0000 F   0  0  0  0  0  0  0  0  0  0  0  0
    5.0120   -2.1168    0.0000 N   0  3  0  0  0  0  0  0  0  0  0  0
    5.0120   -2.9446    0.0000 N   0  5  0  0  0  0  0  0  0  0  0  0
  1  2  1  0      
  2  3  1  0      
  3  4  1  0      
  4  5  1  0      
  4  6  1  0      
  6  7  1  0      
  7  8  3  0      
  5  9  1  0      
  5 10  2  0      
  2 11  2  0      
  9 12  2  0      
 12 13  1  0      
 13 14  2  0      
 14 15  1  0      
 15 16  2  0      
 16  9  1  0      
 15 17  1  0      
  1 18  1  0      
 18 19  1  0      
 19 20  1  0      
 20 21  1  0      
 21 22  1  0      
 22 43  1  0      
 43 23  1  0      
 23 24  1  0      
 24 25  1  0      
 25 41  1  0      
 41 26  1  0      
 41 27  1  0      
 25 28  1  0      
 25 29  1  0      
 24 30  1  0      
 24 31  1  0      
 23 32  1  0      
 23 33  1  0      
 43 34  1  0      
 22 35  1  0      
 22 36  1  0      
 21 37  1  0      
 21 38  1  0      
 20 39  1  0      
 20 40  1  0      
 41 42  1  0      
 43 44  1  0      
 17 45  2  0      
 45 46  2  0      
M  CHG  2  45   1  46  -1
M  END
